# Supplementary material for: Water decontamination under high salinity using the TiO2 NT/PbO2–Cu electrochemical oxidation system: kinetics mechanism and DFT studies
Source: Royal Society of Chemistry journal article supplement (doi:10.1039/d2ew00322h), 2022-01-01
Supplement: d2ew00322h1.pdf [file d2ew00322h1.pdf]

Support information for

**Water decontamination under high salinity via TiO<sub>2</sub>  
NTs/PbO<sub>2</sub>-Cu electro-chemical oxidation system: kinetics  
mechanism and DFT studies**

Jun Zhao <sup>a</sup>, Erdeng Du <sup>b</sup>, Yijie Ai <sup>a</sup>, Jingjing Liu <sup>a</sup>, Hongguang Guo <sup>a\*</sup>

*<sup>a</sup>MOE Key Laboratory of Deep Earth Science and Engineering, College of Architecture  
and Environment, Sichuan University, Chengdu 610065, China*

*<sup>b</sup>School of Environmental and Safety Engineering, Changzhou University, Changzhou  
213164, China*

\*To whom correspondence should be addressed:

Dr. Hongguang Guo E-mail: [hgguo@scu.edu.cn](mailto:hgguo@scu.edu.cn)

Phone: 028-62424898

## Text S1 Preparation of TiO<sub>2</sub> NTS/PbO<sub>2</sub> electrode

The TiO<sub>2</sub> NTs substrate was made via anodization method, and the main steps are listed below<sup>1-3</sup>: 1) Polished Ti sheet through abrasive papers was successively washed by twice-distilled water, ethanol, 0.1M hydrochloric acid, and twice-distilled water respectively in an ultrasonic cleaner (KH5200B, Kunshan Hechuang, China). 2) The anodization experiment was performed in a two electrodes system where earlier obtained Ti sheet served as anode which is parallel to Cu sheet cathode with a distance of 2.5cm. The electrolyte consisted of NaF (0.8 wt%), Na<sub>2</sub>SO<sub>4</sub> (0.8 wt%), ethylene glycol (42 wt%), twice-distilled water (56.4 wt%), and the voltage was fixed at 25V using a DC power supply (PS-303D, Long Wei, Shenzhen, China). The anodization experiment was carried out at room temperature for 2 hours in a magnetic stirrer (DF-101S, Shanghai Yukang, China). After anodization, the obtained TiO<sub>2</sub> NTs sheet was ultrasonic cleaned with two-distilled water and then dried in an oven. 3) The as-formed TiO<sub>2</sub> NTs sheet was calcined at 500°C at ambient atmosphere for 2 hours in a muffle furnace (KSL-1200X, Hefei Kejing, China). The heating and cooling rate were set at 2°C/min and 1°C/min, respectively. The finally annealed TiO<sub>2</sub> NTs sheet was denoted as TiO<sub>2</sub> NTs substrate.

The PbO<sub>2</sub> layer was coated on TiO<sub>2</sub> NTs substrate through variable current electro-deposition method as introduced below<sup>4, 5</sup>: The as-made TiO<sub>2</sub> NTs electrode was used as anode and graphite sheet was used as cathode in an electrolytic cell where the temperature set at 60°C. The deposition was performed in electrolyte containing 0.1M HNO<sub>3</sub>, 0.5M Pb(NO<sub>3</sub>)<sub>2</sub>, 0.5g NaF, under two-stage currents where 25mA/cm<sup>2</sup> was applied first and 10mA/cm<sup>2</sup> was applied last. The obtained PbO<sub>2</sub> coated TiO<sub>2</sub> NTs electrode was then successively ultrasonic cleaned in ethanol, twice-distilled water and finally dried at 50°C for use.

Text S2 The calculation for service life of electrode:

The empirical equation is according to the study of Hoffmann, as follows:<sup>6</sup>

$$T_1 \times i_1^n = T_2 \times i_2^n$$

Where  $T_1$  is the lifetime obtained from current density  $i_1$ ,  $T_2$  is the lifetime obtained from current density  $i_2$ ,  $n$  is the coefficient. In our study,  $T_1 = 6.45\text{h}$  at current density  $100\text{mA}/\text{cm}^2$  and  $T_2 = 34.27\text{h}$  at  $50\text{mA}/\text{cm}^2$  were used to calculate the lifetime of electrode at current density  $10\text{mA}/\text{cm}^2$ .

Table S1 Results of TOC removal, MCE (%), EEO in different salts solution. Condition: current density  $10\text{mA}/\text{cm}^2$ , pH 5.5.

| Solutions with different salts                                      | TOC removal (mg/L, the initial concentration was 3.8mg/L) | MCE (%) | EEO                   |
|---------------------------------------------------------------------|-----------------------------------------------------------|---------|-----------------------|
| 0.1M $\text{Na}_2\text{SO}_4$                                       | 2.85                                                      | 4.24    | $2.32 \times 10^{-3}$ |
| 0.1M NaCl                                                           | 1.69                                                      | 2.52    | $8.48 \times 10^{-5}$ |
| 0.1M $\text{Na}_2\text{SO}_4$ + 0.1M NaCl +<br>0.1M $\text{NaNO}_3$ | 1.79                                                      | 2.67    | $0.82 \times 10^{-4}$ |

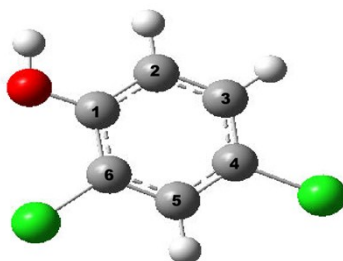

Optimized structure of 2,4-DCP, and the number 1 to 6 represent carbon atoms C1 to C6.

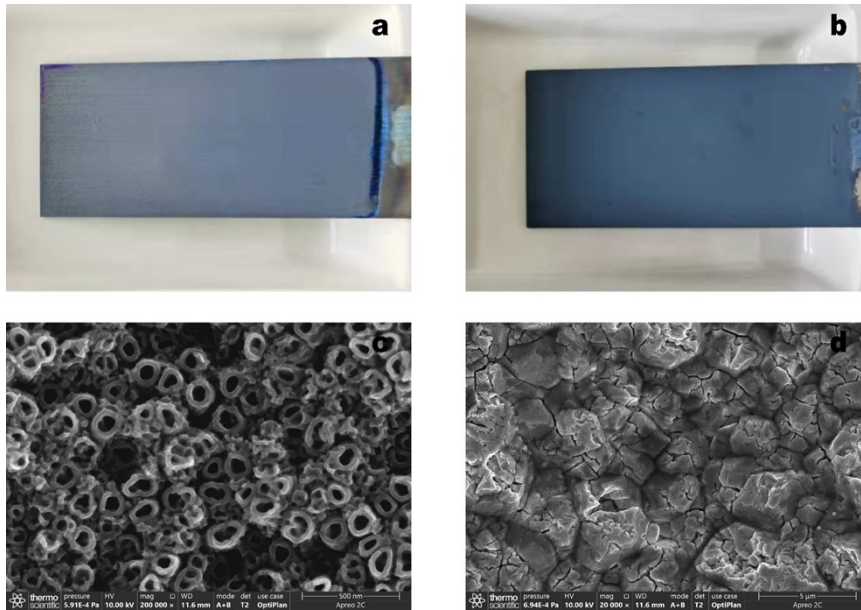

Figure. S1 Digital picture of TiO<sub>2</sub> NTs electrode (a); Digital picture of PbO<sub>2</sub> coated TiO<sub>2</sub> NTs electrode (b); SEM images of TiO<sub>2</sub> NTs electrode (c); SEM images of PbO<sub>2</sub> coated TiO<sub>2</sub> NTs electrode (d).

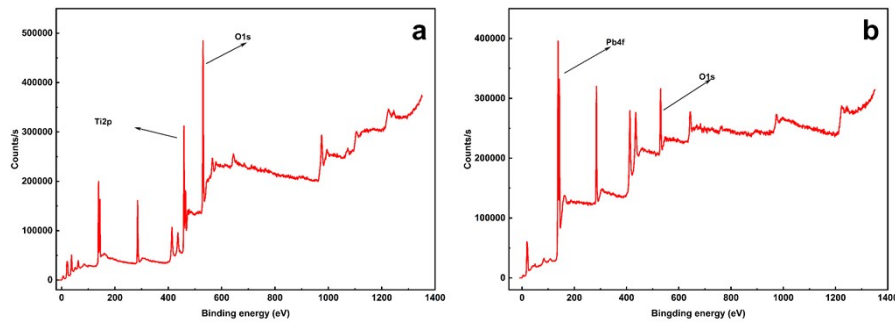

Figure. S2 XPS spectra of TiO<sub>2</sub> nanotube substrate(a); PbO<sub>2</sub> coated layer (b).

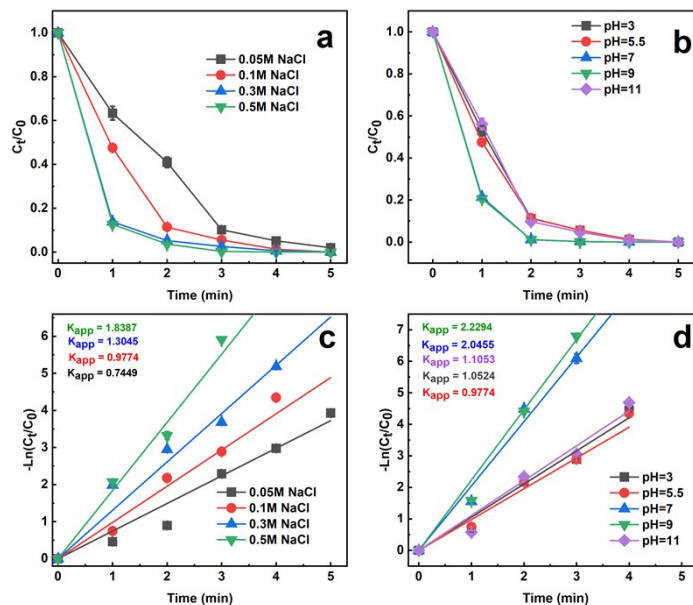

Figure. S3 Degradation of 2,4-DCP and kinetics performance NaCl solution (0.05mM 2,4-DCP):

the effect of NaCl concentration, current density 10mA/cm<sup>2</sup>, pH 5.5 (a, c); the effect of pH,  
current density 10mA/cm<sup>2</sup>, NaCl concentration 0.1M(b, d).

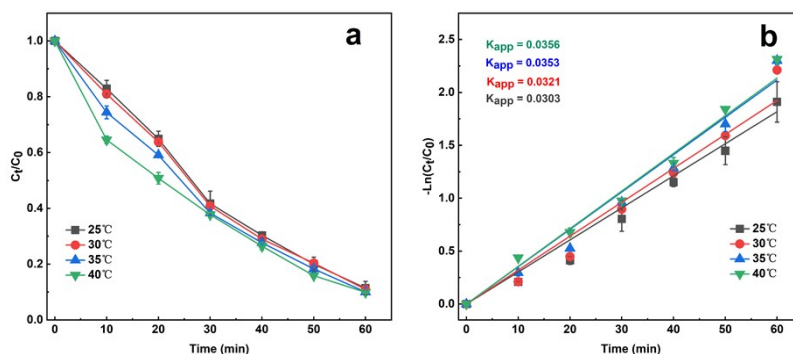

Figure. S4 degradation time course under different temperatures (a); degradation kinetics under different temperatures (b).

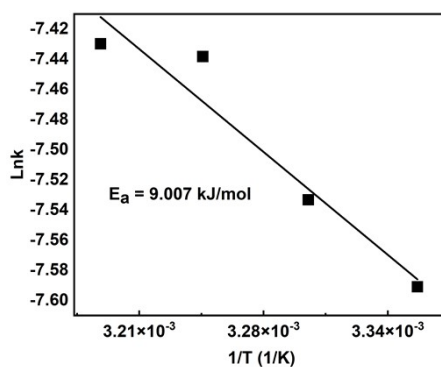

Figure. S5  $\ln k$ - $1/T$  plot for apparent activation energy calculation. Conditions: 2,4-DCP 0.05mM, current density 10mA/cm<sup>2</sup>, pH 5.5, Na<sub>2</sub>SO<sub>4</sub> concentration 0.5M.

## References:

1. G. Zhao, X. Cui, M. Liu, P. Li, Y. Zhang, T. Cao, H. Li, Y. Lei, L. Liu and D. Li, Electrochemical Degradation of Refractory Pollutant Using a Novel Microstructured TiO<sub>2</sub> Nanotubes/Sb-Doped SnO<sub>2</sub> Electrode, *Environmental Science & Technology*, 2009, **43**, 1480-1486.
2. H. Zhou and Y. Zhang, Electrochemically Self-Doped TiO<sub>2</sub> Nanotube Arrays for Supercapacitors, *The Journal of Physical Chemistry C*, 2014, **118**, 5626-5636.
3. X. Cui, G. Zhao, Y. Lei, H. Li, P. Li and M. Liu, Novel vertically aligned TiO<sub>2</sub> nanotubes embedded with Sb-doped SnO<sub>2</sub> electrode with high oxygen evolution potential and long service time, *Materials Chemistry and Physics*, 2009, **113**, 314-321.
4. Q. Zhuo, M. Luo, Q. Guo, G. Yu, S. Deng, Z. Xu, B. Yang and X. Liang, Electrochemical Oxidation of Environmentally Persistent Perfluorooctane Sulfonate by a Novel Lead Dioxide Anode, *Electrochimica Acta*, 2016, **213**, 358-367.
5. I. Sirés, C. T. J. Low, C. Ponce-de-León and F. C. Walsh, The characterisation of PbO<sub>2</sub>-coated electrodes prepared from aqueous methanesulfonic acid under controlled deposition conditions, *Electrochimica Acta*, 2010, **55**, 2163-2172.
6. Y. Yang and M. R. Hoffmann, Synthesis and Stabilization of Blue-Black TiO<sub>2</sub> Nanotube Arrays for Electrochemical Oxidant Generation and Wastewater Treatment, *Environmental Science & Technology*, 2016, **50**, 11888-11894.
